# Supplementary material for: MST2 kinase suppresses rDNA transcription in response to DNA damage by phosphorylating nucleolar histone H2B
Source: PubMed Central journal article supplement (PMC6068430; doi:10.15252/embj.201798760), 2018-05-22

**Figure 1: Nucleolar histone H2B gets phosphorylated at Serine 14 in response to  $\gamma$ IR**

**1D**

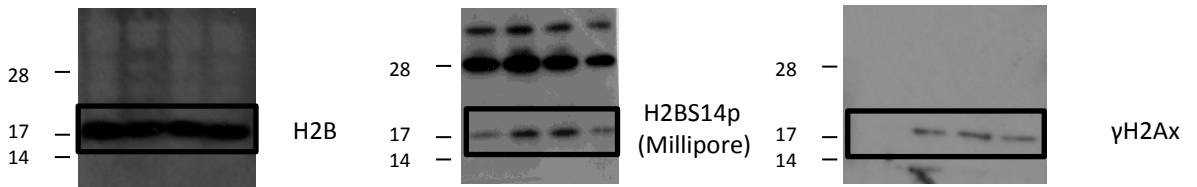

Supplement: EMBJ-37-e98760-s002.pdf [file EMBJ-37-e98760-s002.pdf]
