# Supplementary material for: MST2 kinase suppresses rDNA transcription in response to DNA damage by phosphorylating nucleolar histone H2B
Source: PubMed Central journal article supplement (PMC6068430; doi:10.15252/embj.201798760), 2018-05-22

Figure 5. Nucleolar H2BS14p establishment depends on the ATM-RASSF1A-MST2 axis

5B

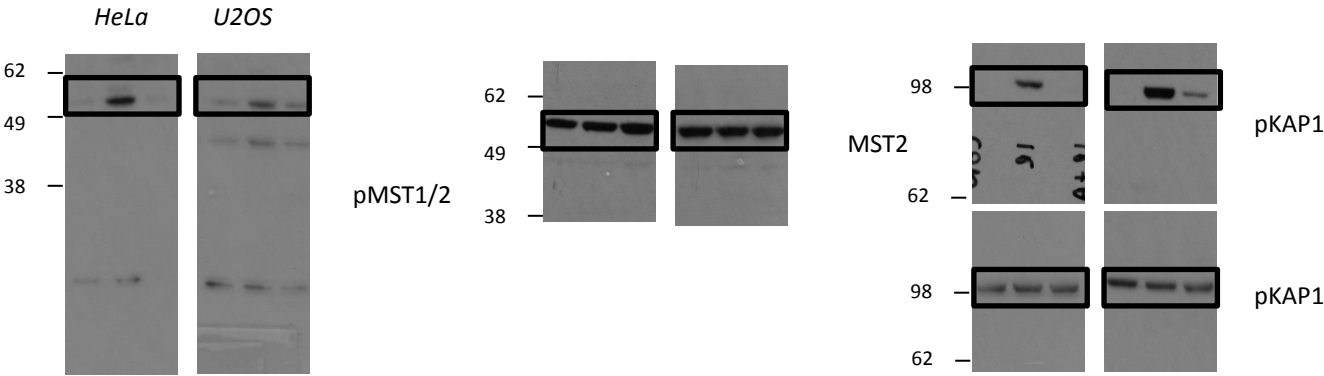

5E

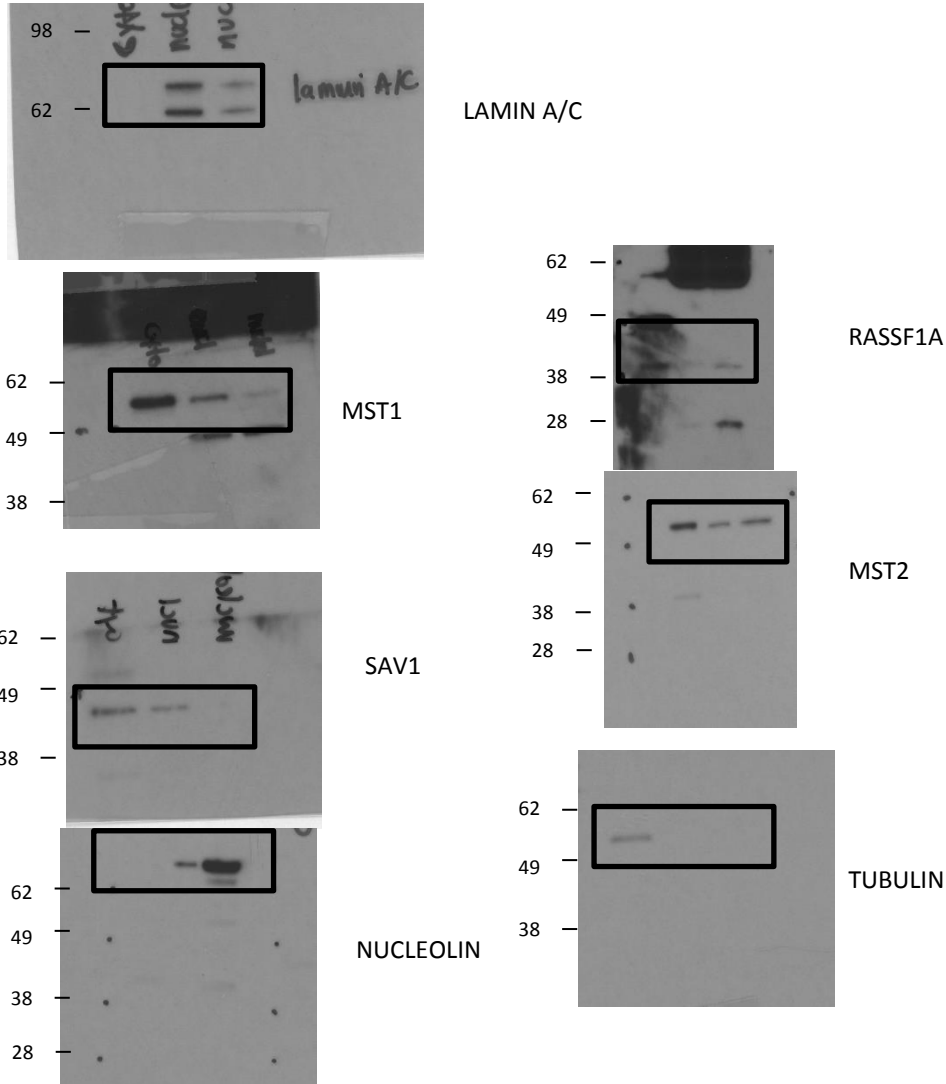

Supplement: EMBJ-37-e98760-s004.pdf [file EMBJ-37-e98760-s004.pdf]
