# Supplementary material for: MST2 kinase suppresses rDNA transcription in response to DNA damage by phosphorylating nucleolar histone H2B
Source: PubMed Central journal article supplement (PMC6068430; doi:10.15252/embj.201798760), 2018-05-22

Figure 6. rDNA DSBs result in MST2 dependent transcriptional shut down.

6A

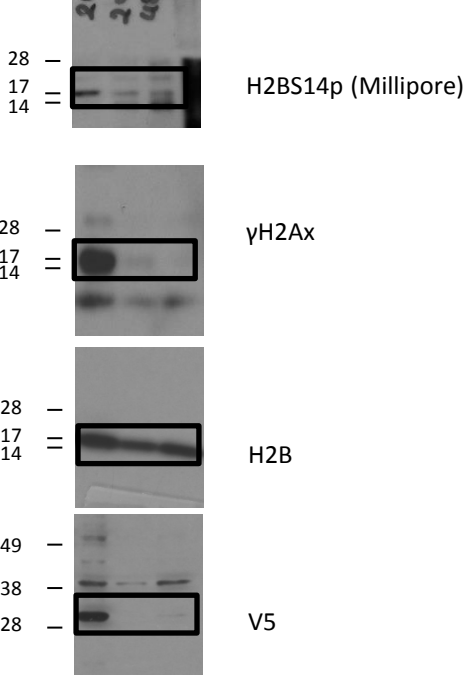

Supplement: EMBJ-37-e98760-s005.pdf [file EMBJ-37-e98760-s005.pdf]
